# Supplementary material
Source: PubMed Central journal article supplement (PMC11185234)
Supplement: sj-pdf-1-jfm-10.1177_1098612X15587956.pdf [file sj-pdf-1-jfm-10.1177_1098612X15587956.pdf]

**Appendix 1: Enclosure Activity Score**

| Score |             | Description                                                                                                                                   |
|-------|-------------|-----------------------------------------------------------------------------------------------------------------------------------------------|
| 1     | Sedate      | <ul style="list-style-type: none"><li>• Stationary (recumbent or curled up), ignoring observer, eyes closed</li></ul>                         |
| 2     | Calm        | <ul style="list-style-type: none"><li>• Stationary (sitting or recumbent), may or may not look at observer, squinting eyes/blinking</li></ul> |
| 3     | Neutral     | <ul style="list-style-type: none"><li>• Stationary (standing, sitting, or recumbent), intently watching observer</li></ul>                    |
| 4     | Active      | <ul style="list-style-type: none"><li>• Mobile, pacing, front paws on walls, vocal, bunting, kneading, rolling on ground</li></ul>            |
| 5     | Very Active | <ul style="list-style-type: none"><li>• Very mobile, frantic pacing, jumping with all paws off ground, vocal</li></ul>                        |
