# Supplementary material
Source: PubMed Central journal article supplement (PMC11185234)
Supplement: sj-pdf-2-jfm-10.1177_1098612X15587956.pdf [file sj-pdf-2-jfm-10.1177_1098612X15587956.pdf]

| Appendix 2: Stress Score (adapted from McCune 1994) |                |                                                                                                                                                                                                                                                                                                                                                                                                                                                                                                                                                                                                                                                                                                                                                                                                                                             |
|-----------------------------------------------------|----------------|---------------------------------------------------------------------------------------------------------------------------------------------------------------------------------------------------------------------------------------------------------------------------------------------------------------------------------------------------------------------------------------------------------------------------------------------------------------------------------------------------------------------------------------------------------------------------------------------------------------------------------------------------------------------------------------------------------------------------------------------------------------------------------------------------------------------------------------------|
| Score                                               |                | Description                                                                                                                                                                                                                                                                                                                                                                                                                                                                                                                                                                                                                                                                                                                                                                                                                                 |
| 1                                                   | Fully Relaxed  | <ul style="list-style-type: none"> <li>• Body laid on side or back</li> <li>• Belly exposed and slow ventilation</li> <li>• Legs fully extended</li> <li>• Tail extended or loosely wrapped</li> <li>• Head laid on the surface with chin upwards or on the surface</li> <li>• Eyes closed or half open and may be blinking slowly</li> </ul> <ul style="list-style-type: none"> <li>• Pupils normal</li> <li>• Ears half back (normal)</li> <li>• Whiskers lateral (normal)</li> <li>• No vocalization</li> <li>• Sleeping or resting</li> </ul>                                                                                                                                                                                                                                                                                           |
| 2                                                   | Weakly relaxed | <ul style="list-style-type: none"> <li>• Body laid ventrally or half on side, sitting, standing or moving with back horizontal</li> <li>• Belly exposed or not exposed and slow or normal ventilation</li> <li>• Legs bent, hind legs may be laid out, and legs extended when standing</li> <li>• Tail extended or loosely wrapped and tail may also be up or loosely downwards</li> <li>• Head laid on the surface or over body and some movement</li> <li>• Eyes closed, half opened, or normally opened</li> </ul> <ul style="list-style-type: none"> <li>• Pupils normal</li> <li>• Ears half back or erected to front</li> <li>• Whiskers lateral or forward</li> <li>• No vocalization</li> <li>• Sleeping, resting, alert or active, and may be playing</li> </ul>                                                                   |
| 3                                                   | Weakly tense   | <ul style="list-style-type: none"> <li>• Body laid ventrally, sitting, standing or moving, and back horizontal</li> <li>• Belly not exposed and normal ventilation</li> <li>• Legs bent and legs extended when standing</li> <li>• Tail on the body or curved backwards, up or tense downwards, and may be twitching</li> <li>• Head over the body and some movement</li> <li>• Eyes normal opened</li> </ul> <ul style="list-style-type: none"> <li>• Pupils normal</li> <li>• Ears half back (normal), erected to front, or back and forward on head</li> <li>• Whiskers lateral (normal) or forward</li> <li>• Meowing or quiet</li> <li>• Resting, awake, or actively exploring</li> </ul>                                                                                                                                              |
| 4                                                   | Very Tense     | <ul style="list-style-type: none"> <li>• Body laid ventrally, rolled or sitting, standing or moving, and body behind lower than in front Belly not exposed and normal ventilation</li> <li>• Legs bent, hind legs bent when standing, and extended in front</li> <li>• Tail close to the body, tense downwards or curled forward, and may be twitching</li> <li>• Head over the body or pressed to body and little or no movement</li> <li>• Eyes widely opened or pressed together</li> </ul> <ul style="list-style-type: none"> <li>• Pupils normal or partially dilated</li> <li>• Ears erected to front or back, or back and forward on head</li> <li>• Whiskers lateral or forward</li> <li>• Meow, plaintive meow, or quiet</li> <li>• Cramped sleeping, resting or alert, may be actively exploring, and trying to escape</li> </ul> |
| 5                                                   | Fearful, stiff | <ul style="list-style-type: none"> <li>• Body laid ventrally, sitting, standing or moving, and body behind lower than in front</li> <li>• Belly not exposed and normal or fast ventilation</li> <li>• Legs bent or bent near to surface</li> <li>• Tail close to the body, curled forward</li> <li>• Head on the plane of the body and less or no movement</li> <li>• Eyes widely opened</li> </ul> <ul style="list-style-type: none"> <li>• Pupils dilated</li> <li>• Ears partially flattened</li> <li>• Whiskers lateral, forward, or back</li> <li>• Plaintive meow or yowling, growling, or quiet</li> <li>• Alert and may be actively trying to escape</li> </ul>                                                                                                                                                                     |
| 6                                                   | Very fearful   | <ul style="list-style-type: none"> <li>• Body laid ventrally or crouched directly on top of all paws, may be shaking, and whole body near to ground</li> <li>• Belly not exposed and fast ventilation</li> <li>• Legs bent or bent near to surface</li> <li>• Tail close to the body and curled forward close to the body</li> <li>• Head near to surface and motionless</li> <li>• Eyes fully opened</li> </ul> <ul style="list-style-type: none"> <li>• Pupils fully dilated</li> <li>• Ears fully flattened</li> <li>• Whiskers back</li> <li>• Plaintive meow, yowling, growling, or quiet</li> <li>• Motionless alert or actively prowling</li> </ul>                                                                                                                                                                                  |

|   |            |                                                                                                                                                                                                                                                                                       |                                                                                                                                                                                                                             |
|---|------------|---------------------------------------------------------------------------------------------------------------------------------------------------------------------------------------------------------------------------------------------------------------------------------------|-----------------------------------------------------------------------------------------------------------------------------------------------------------------------------------------------------------------------------|
| 7 | Terrorized | <ul style="list-style-type: none"><li>• Body crouched directly on all fours and shaking</li><li>• Belly not exposed and fast ventilation</li><li>• Legs bent</li><li>• Tail close to the body</li><li>• Head lower than the body and motionless</li><li>• Eyes fully opened</li></ul> | <ul style="list-style-type: none"><li>• Pupils fully dilated</li><li>• Ears fully flattened back on head</li><li>• Whiskers back</li><li>• Plaintive meow, yowling, growling, or quiet</li><li>• Motionless alert</li></ul> |
|---|------------|---------------------------------------------------------------------------------------------------------------------------------------------------------------------------------------------------------------------------------------------------------------------------------------|-----------------------------------------------------------------------------------------------------------------------------------------------------------------------------------------------------------------------------|

*Reproduced with permission from Universities Federation for Animal Welfare, © 1997<sup>(Kessler)</sup>*
